# Supplementary material
Source: ML conference proceedings conference paper supplement (https://openaccess.thecvf.com/content/WACV2025/html/Thiele_Investigating_Imaging_Annotation_WACV_2025_paper.html)
Supplement: Supplementary file 1 [file Thiele_Investigating_Imaging_Annotation_WACV_2025_supplemental.pdf]

## A. Appendix

### A.1. Dataset

|   |       | Total | PMC | Spg Ad | Spg | Pl-Z | P   | rsptd | esptd | SC  |
|---|-------|-------|-----|--------|-----|------|-----|-------|-------|-----|
| 0 | val   | 1,050 | 72  | 47     | 93  | 167  | 220 | 134   | 192   | 125 |
|   | train | 4,150 | 283 | 184    | 366 | 659  | 877 | 531   | 759   | 491 |
| 1 | val   | 1,047 | 72  | 47     | 93  | 167  | 220 | 134   | 190   | 124 |
|   | train | 4,153 | 283 | 184    | 366 | 659  | 877 | 531   | 761   | 492 |
| 2 | val   | 1,041 | 71  | 46     | 92  | 164  | 220 | 134   | 190   | 124 |
|   | train | 4,159 | 284 | 185    | 367 | 662  | 877 | 531   | 761   | 492 |
| 3 | val   | 1,036 | 71  | 46     | 91  | 164  | 220 | 132   | 190   | 122 |
|   | train | 4,164 | 284 | 185    | 368 | 662  | 877 | 533   | 761   | 494 |
| 4 | val   | 1,026 | 69  | 45     | 90  | 164  | 217 | 131   | 189   | 121 |
|   | train | 4,174 | 286 | 186    | 369 | 662  | 880 | 534   | 762   | 495 |

Table A.1. 5-fold cross-validation split for training and validation dataset.

### A.2. Self-Supervised Augmentation Settings

#### A.2.1 SimCLR

- colour jitter
  - probability = 0.8
  - strength = 1.0
  - brightness = 0.8
  - contrast = 0.8
  - saturation = 0.8
  - hue = 0.2
- random resized crop (scale  $\in (0.08, 1.0)$ )
- random gray scale (probability = 0.2)
- gaussian blur
  - probability = 0.5
  - $\sigma \in (0.1, 0.2)$
- horizontal flip (probability = 0.5)

| Scan Setting | Backbone |          |           |       |       |       |
|--------------|----------|----------|-----------|-------|-------|-------|
|              | ResNet18 | ResNet50 | ResNet101 | ViT-T | ViT-S | ViT-B |
| 20× SZP      | 8192     | 4096     | 3072      | 1024  | 512   | 256   |
| 40× EFI      | 4096     | 1024     | 768       | 1024  | 512   | 256   |

Table A.2. Batch sizes for SimCLR Training.

#### A.2.2 DINO

- 2 global views
  - size = image size
  - random resized crop (scale  $\in (0.5, 1.0)$ )
- 6 local views

- size =  $\frac{\text{image size}}{2}$
- local random resized crop (scale  $\in (0.1, 0.5)$ )

- colour jitter
  - probability = 0.8
  - strength = 0.5
  - brightness = 0.8
  - contrast = 0.8
  - saturation = 0.4
  - hue = 0.2
- random gray scale (probability = 0.2)
- gaussian blur
  - probability (global view 1, global view 2, local views) = (1.0, 0.1, 0.5)
  - $\sigma \in (0.1, 0.2)$
- solarisation (probability = 0.2)
- horizontal flip (probability = 0.5)

| Scan Setting | Backbone |          |           |       |       |       |
|--------------|----------|----------|-----------|-------|-------|-------|
|              | ResNet18 | ResNet50 | ResNet101 | ViT-T | ViT-S | ViT-B |
| 20× SZP      | 8192     | 1536     | 1280      | 512   | 256   | 128   |
| 40× EFI      | 3072     | 768      | 512       | 512   | 256   | 128   |

Table A.3. Batch sizes for DINO Training.

#### A.2.3 MAE

- patch masking ratio = 0.75
- random resize crop (scale  $\in (0.5, 1.0)$ )
- random horizontal flip (probability = 0.5)

| Scan Setting | Backbone |       |       |
|--------------|----------|-------|-------|
|              | ViT-T    | ViT-S | ViT-B |
| 20× SZP      | 3072     | 2048  | 1536  |
| 40× EFI      | 3072     | 2048  | 128   |

Table A.4. Batch sizes for MAE Training.

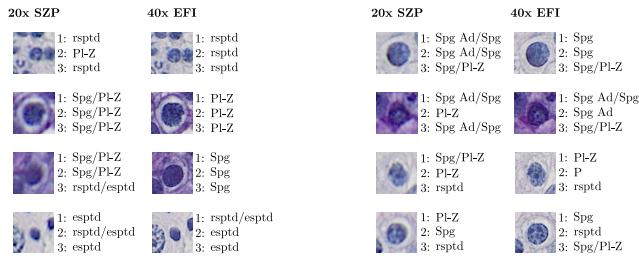

Figure A.1. Examples for annotation of some cell images in 20 $\times$  SZP and 40 $\times$  EFI quality by the three annotators. The numbers before the labels refer to the annotators (1-3).

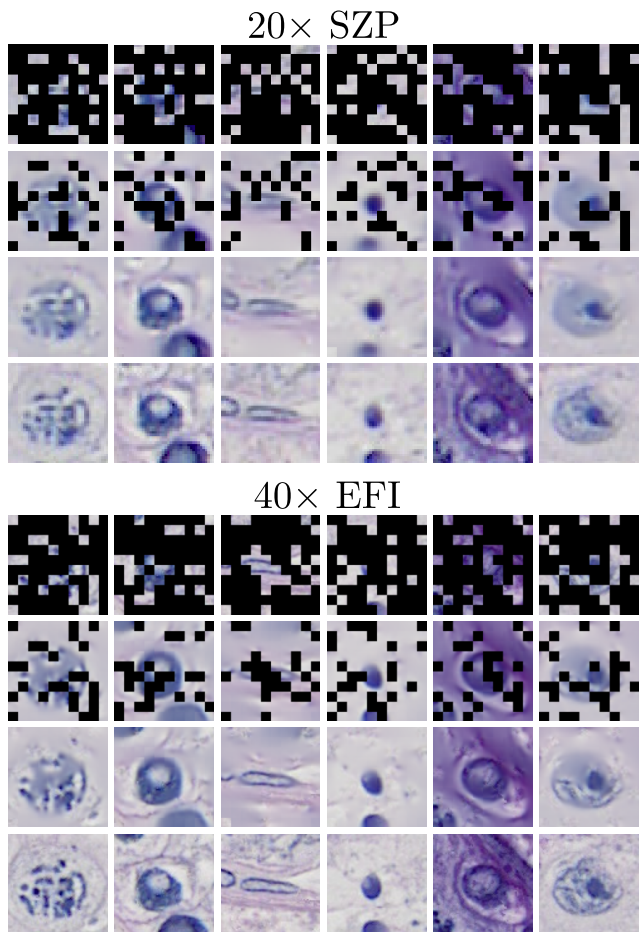

Figure A.2. ViT-B MAE reconstructions for 20 $\times$  SZP (top) and 40 $\times$  EFI (bottom) cell crops with background. From top to bottom the images display: 1. the input with masked areas in black, 2. the reconstructions with unmasked patches in black, 3. the combination of reconstructions and input patches, 4. the original image.

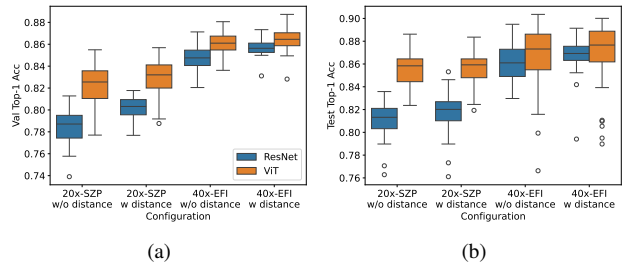

Figure A.3. Influence of distance information and scan settings on val (a) and test (b) Top-1 Acc on ResNet (18, 50, 101) and ViT (T,S,B) pretrained with any SSL approach. 300 models were trained only with background in 60 configurations. The legend of (a) also applies to (b).



| Scan-Setting | Pretraining | Backbone  | Background | Dist-Info | Data-Split  | best fold<br>Top-1 Acc<br>(based on Val) | Mean<br>Top-1 Acc                   | Mean<br>Top-2 Acc                          | Mean<br>Adjacent-1 Acc                     | Mean Adjacent-1<br>Dynamic Acc             |
|--------------|-------------|-----------|------------|-----------|-------------|------------------------------------------|-------------------------------------|--------------------------------------------|--------------------------------------------|--------------------------------------------|
| 20x-SZP      | ImageNet    | ResNet18  | with       | False     | val<br>test | 0.825<br>0.833                           | 0.820 ±0.004<br>0.827 ±0.014        | 0.940 ±0.003<br>0.955 ±0.009               | 0.921 ±0.003<br>0.953 ±0.005               | 0.932 ±0.005<br>0.973 ±0.004               |
| 20x-SZP      | ImageNet    | ResNet18  | with       | True      | val<br>test | 0.836<br>0.846                           | 0.826 ±0.008<br>0.832 ±0.015        | 0.945 ±0.006<br>0.963 ±0.006               | 0.926 ±0.006<br><b>0.957 ±0.009</b>        | 0.934 ±0.006<br>0.974 ±0.006               |
| 20x-SZP      | ImageNet    | ResNet18  | without    | False     | val<br>test | 0.814<br>0.808                           | 0.802 ±0.009<br>0.800 ±0.010        | 0.931 ±0.004<br>0.939 ±0.005               | 0.907 ±0.005<br>0.930 ±0.006               | 0.916 ±0.007<br>0.948 ±0.006               |
| 20x-SZP      | ImageNet    | ResNet18  | without    | True      | val<br>test | 0.826<br>0.844                           | 0.822 ±0.004<br>0.824 ±0.014        | 0.943 ±0.006<br>0.957 ±0.007               | 0.924 ±0.005<br>0.952 ±0.003               | 0.934 ±0.002<br>0.972 ±0.006               |
| 20x-SZP      | ImageNet    | ResNet50  | with       | False     | val<br>test | 0.828<br>0.836                           | 0.821 ±0.008<br>0.830 ±0.008        | 0.942 ±0.004<br>0.958 ±0.007               | 0.921 ±0.005<br>0.954 ±0.006               | 0.930 ±0.006<br>0.970 ±0.005               |
| 20x-SZP      | ImageNet    | ResNet50  | with       | True      | val<br>test | 0.831<br><b>0.856</b>                    | 0.826 ±0.003<br><b>0.839 ±0.012</b> | <b>0.949 ±0.007</b><br><b>0.969 ±0.008</b> | 0.929 ±0.006<br><b>0.957 ±0.005</b>        | <b>0.939 ±0.009</b><br><b>0.976 ±0.007</b> |
| 20x-SZP      | ImageNet    | ResNet50  | without    | False     | val<br>test | 0.821<br>0.783                           | 0.806 ±0.012<br>0.811 ±0.017        | 0.929 ±0.006<br>0.945 ±0.009               | 0.911 ±0.011<br>0.937 ±0.010               | 0.922 ±0.011<br>0.955 ±0.011               |
| 20x-SZP      | ImageNet    | ResNet50  | without    | True      | val<br>test | 0.827<br>0.843                           | 0.822 ±0.005<br>0.835 ±0.011        | 0.946 ±0.005<br>0.965 ±0.006               | 0.927 ±0.007<br>0.952 ±0.007               | 0.934 ±0.009<br>0.967 ±0.008               |
| 20x-SZP      | ImageNet    | ResNet101 | with       | False     | val<br>test | 0.823<br>0.831                           | 0.819 ±0.004<br>0.811 ±0.016        | 0.942 ±0.003<br>0.960 ±0.008               | 0.924 ±0.007<br>0.952 ±0.010               | 0.932 ±0.009<br>0.964 ±0.010               |
| 20x-SZP      | ImageNet    | ResNet101 | with       | True      | val<br>test | <b>0.839</b><br>0.851                    | <b>0.830 ±0.010</b><br>0.835 ±0.016 | 0.946 ±0.010<br><b>0.969 ±0.005</b>        | <b>0.930 ±0.005</b><br><b>0.957 ±0.009</b> | 0.938 ±0.008<br>0.969 ±0.008               |
| 20x-SZP      | ImageNet    | ResNet101 | without    | False     | val<br>test | 0.816<br>0.820                           | 0.806 ±0.009<br>0.802 ±0.010        | 0.931 ±0.008<br>0.943 ±0.007               | 0.913 ±0.007<br>0.926 ±0.005               | 0.922 ±0.006<br>0.943 ±0.007               |
| 20x-SZP      | ImageNet    | ResNet101 | without    | True      | val<br>test | 0.828<br>0.824                           | 0.822 ±0.009<br>0.829 ±0.006        | 0.946 ±0.009<br>0.962 ±0.002               | 0.924 ±0.012<br>0.949 ±0.004               | 0.929 ±0.014<br>0.965 ±0.008               |
| 40x-EFI      | ImageNet    | ResNet18  | with       | False     | val<br>test | 0.861<br>0.826                           | 0.857 ±0.004<br>0.825 ±0.013        | 0.962 ±0.008<br>0.951 ±0.010               | 0.944 ±0.003<br>0.951 ±0.011               | 0.947 ±0.005<br>0.963 ±0.011               |
| 40x-EFI      | ImageNet    | ResNet18  | with       | True      | val<br>test | 0.867<br>0.852                           | 0.864 ±0.002<br>0.848 ±0.014        | <b>0.963 ±0.004</b><br>0.963 ±0.005        | <b>0.950 ±0.003</b><br><b>0.959 ±0.004</b> | <b>0.957 ±0.004</b><br><b>0.973 ±0.003</b> |
| 40x-EFI      | ImageNet    | ResNet18  | without    | False     | val<br>test | 0.854<br>0.737                           | 0.846 ±0.008<br>0.751 ±0.030        | 0.954 ±0.005<br>0.896 ±0.026               | 0.933 ±0.004<br>0.904 ±0.023               | 0.937 ±0.006<br>0.923 ±0.023               |
| 40x-EFI      | ImageNet    | ResNet18  | without    | True      | val<br>test | 0.856<br>0.760                           | 0.853 ±0.003<br>0.779 ±0.019        | 0.960 ±0.004<br>0.923 ±0.013               | 0.941 ±0.003<br>0.925 ±0.017               | 0.947 ±0.002<br>0.945 ±0.010               |
| 40x-EFI      | ImageNet    | ResNet50  | with       | False     | val<br>test | 0.864<br><b>0.870</b>                    | 0.857 ±0.007<br>0.845 ±0.028        | 0.959 ±0.007<br>0.958 ±0.012               | 0.947 ±0.003<br>0.957 ±0.011               | 0.951 ±0.004<br>0.959 ±0.012               |
| 40x-EFI      | ImageNet    | ResNet50  | with       | True      | val<br>test | 0.872<br>0.862                           | 0.864 ±0.005<br><b>0.853 ±0.012</b> | <b>0.963 ±0.005</b><br><b>0.970 ±0.007</b> | 0.948 ±0.005<br><b>0.959 ±0.006</b>        | 0.954 ±0.007<br>0.969 ±0.005               |
| 40x-EFI      | ImageNet    | ResNet50  | without    | False     | val<br>test | 0.849<br>0.778                           | 0.842 ±0.005<br>0.776 ±0.005        | 0.953 ±0.009<br>0.930 ±0.008               | 0.932 ±0.005<br>0.921 ±0.005               | 0.938 ±0.008<br>0.930 ±0.008               |
| 40x-EFI      | ImageNet    | ResNet50  | without    | True      | val<br>test | 0.865<br>0.810                           | 0.856 ±0.008<br>0.811 ±0.006        | 0.962 ±0.003<br>0.941 ±0.011               | 0.943 ±0.004<br>0.940 ±0.007               | 0.951 ±0.005<br>0.952 ±0.012               |
| 40x-EFI      | ImageNet    | ResNet101 | with       | False     | val<br>test | 0.863<br>0.839                           | 0.859 ±0.003<br>0.840 ±0.003        | 0.958 ±0.005<br>0.959 ±0.009               | 0.945 ±0.005<br>0.955 ±0.006               | 0.950 ±0.005<br>0.961 ±0.005               |
| 40x-EFI      | ImageNet    | ResNet101 | with       | True      | val<br>test | <b>0.873</b><br>0.850                    | <b>0.866 ±0.009</b><br>0.839 ±0.012 | 0.962 ±0.008<br>0.960 ±0.005               | <b>0.950 ±0.007</b><br>0.954 ±0.005        | <b>0.957 ±0.006</b><br>0.960 ±0.009        |
| 40x-EFI      | ImageNet    | ResNet101 | without    | False     | val<br>test | 0.849<br>0.801                           | 0.839 ±0.008<br>0.786 ±0.011        | 0.953 ±0.002<br>0.927 ±0.011               | 0.930 ±0.006<br>0.924 ±0.012               | 0.939 ±0.006<br>0.944 ±0.007               |
| 40x-EFI      | ImageNet    | ResNet101 | without    | True      | val<br>test | 0.860<br>0.798                           | 0.852 ±0.008<br>0.817 ±0.017        | 0.960 ±0.003<br>0.948 ±0.007               | 0.941 ±0.007<br>0.947 ±0.008               | 0.948 ±0.008<br>0.958 ±0.012               |

Table A.6. Aggregated baseline results pretrained on ImageNet evaluating different scan qualities (20× SZP and 40× EFI), usage of cell background and distance information on validation and test dataset. Results in **bold** indicate the best validation results, and additionally, underlined values are the best test results within sections separated by double lines.
